# Supplementary material for: Protein corona potentiates the recovery of nanoparticle-induced disrupted tight junctions in endothelial cells
Source: Royal Society of Chemistry journal article supplement (doi:10.1039/d4nh00178h), 2024-11-08
Supplement: d4nh00178h1.pdf [file d4nh00178h1.pdf]

# **Protein corona potentiates recovery of nanoparticle-induced disrupted tight junctions in endothelial cells**

Muhammad Daniyal Ghouri<sup>a, b</sup>, Ayesha Tariq<sup>b, c</sup>, Jabran Saleem<sup>a, b</sup>, Abdul Muhaymin<sup>a, b</sup>,

Rong Cai<sup>a, b, \*</sup> Chunying Chen<sup>a, b, \*</sup>

<sup>a</sup>CAS Key Laboratory for Biomedical Effects of Nanomaterials and Nanosafety & CAS Center for Excellence in Nanoscience, National Center for Nanoscience and Technology of China, Chinese Academy of Sciences (CAS), Beijing 100190, China

<sup>b</sup>University of Chinese Academy of Sciences, Beijing 100049, China

<sup>c</sup> CAS Key Laboratory of Nanosystem and Hierarchical Fabrication National Center for Nanoscience and Technology Beijing 100190, China.

Prof. C.Y. Chen, Dr. R. Cai

Corresponding authors: [chenchy@nanoctr.cn](mailto:chenchy@nanoctr.cn) and [cair@nanoctr.cn](mailto:cair@nanoctr.cn)

| Sample                  | Zeta Potential (mV) in Water | Zeta Potential (mV) in DMEM | Hydrodynamic Size (nm) in Water | Hydrodynamic Size (nm) in DMEM |
|-------------------------|------------------------------|-----------------------------|---------------------------------|--------------------------------|
| N <sub>Sp</sub>         | -39.02 ± 0.28                | -12.17 ± 0.18               | 43.35 ± 1.07                    | 50.18 ± 2.13                   |
| N <sub>St</sub>         | -35.57 ± 0.34                | -9.08 ± 0.36                | 58.10 ± 3.27                    | 59.37 ± 1.64                   |
| N <sub>Sp</sub> @P<br>C | -19.43 ± 0.48                | -7.05 ± 0.14                | 108.34 ± 5.61                   | 115.73 ± 4.03                  |
| N <sub>St</sub> @P<br>C | -17.62 ± 0.12                | -6.11 ± 0.23                | 146.67 ± 10.29                  | 159.14 ± 8.52                  |

**Table S1.** Comparison of zeta potential and hydrodynamic sizes in water and DMEM (cell culture media without FBS)

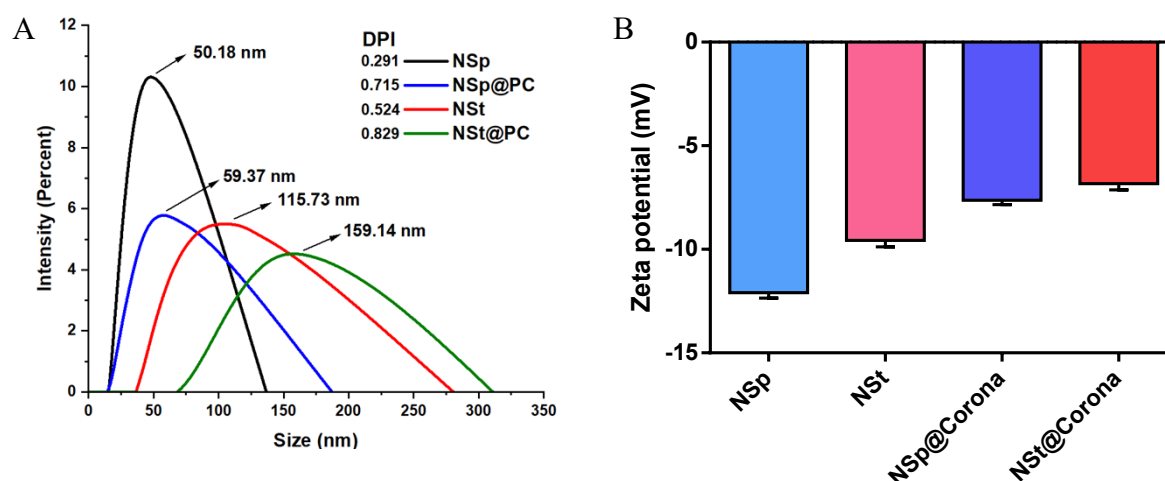

**Figure S1.** Behavior of the Np@protein complex within cellular environments. (A) Dynamic light scattering analysis of N<sub>Sp</sub>, N<sub>St</sub>, N<sub>Sp</sub>@PC and N<sub>St</sub>@PC in DMEM (cell culture media without FBS). The polydispersity index (PDI) is also included within the graph. (B) Zeta potential measurement of all nanoparticles. The data is presented as the mean ± SD, (n = 3).

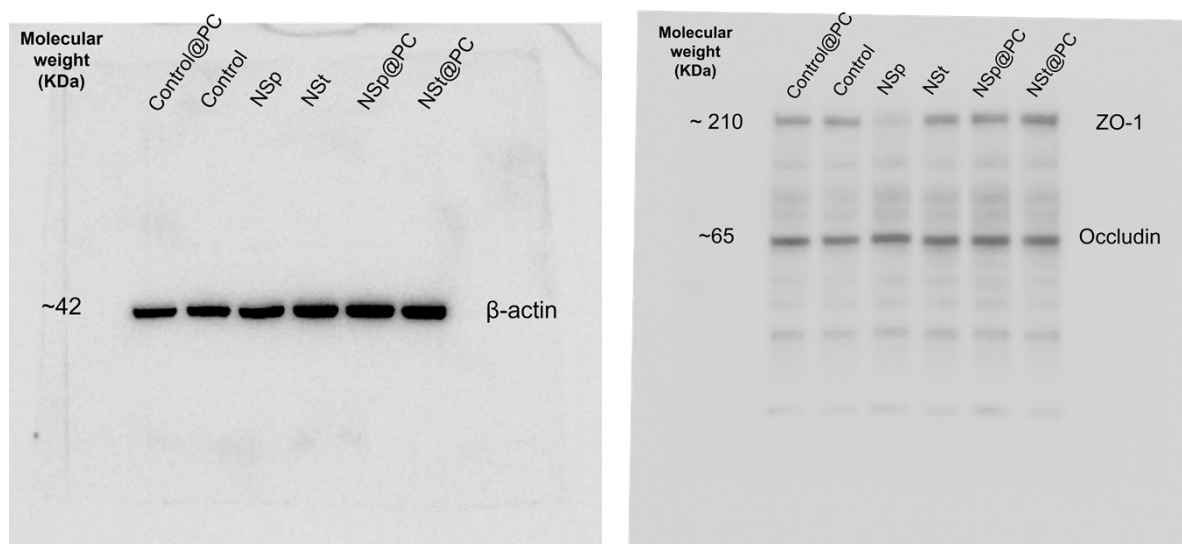

**Figure S2.** Western blot analysis of the ZO-1, occludin, and  $\beta$ -actin expression for NSp, NSt, NSp@PC and NSt@PC.
